# Supplementary material for: Hydrophilic Modification of Dialysis Membranes Sustains Middle Molecule Removal and Filtration Characteristics
Source: MDPI journal article supplement (doi:10.3390/membranes14040083), 2024-04-03
Supplement: s1 [file s1]

**Table S1.**  $\beta$ 2-microglobulin, inulin, creatinine, and urea clearances after protein adsorption to the membrane. Clearances were measured before as well as after 30 min and 60 min plasma recirculation. Displayed is the mean  $\pm$  SD clearance for all dialyzers tested.

| Parameter                        | Clearance at 0 min<br>[ml/min/m <sup>2</sup> ] | Clearance at 30 min<br>[ml/min/m <sup>2</sup> ] | Clearance at 60 min<br>[ml/min/m <sup>2</sup> ] |
|----------------------------------|------------------------------------------------|-------------------------------------------------|-------------------------------------------------|
| $\beta$ 2-microglobulin [12 kDa] | 38.1 $\pm$ 8.4                                 | 30.9 $\pm$ 6.9                                  | 30.2 $\pm$ 6.9                                  |
| Inulin [5 kDa]                   | 84.7 $\pm$ 8.0                                 | 77.3 $\pm$ 7.3                                  | 76.7 $\pm$ 7.1                                  |
| Creatinine [113 Da]              | 138.9 $\pm$ 4.1                                | 137.8 $\pm$ 4.4                                 | 137.7 $\pm$ 4.0                                 |
| Urea [60 Da]                     | 150.3 $\pm$ 4.4                                | 149.7 $\pm$ 4.6                                 | 149.6 $\pm$ 4.5                                 |
